# Supplementary material for: Heightened visual attention does not affect inner ear function as measured by otoacoustic emissions
Source: PeerJ. 2017 Dec 21;5:e4199. doi: 10.7717/peerj.4199 (PMC5742277; doi:10.7717/peerj.4199)
Supplement: Supplemental Information 1 [file peerj-05-4199-s001.xlsx]

## Sheet: Fig 1
	VEPs [uV]
	Electrode/task/stimulus
	Fz	Cz	Pz	Fz	Cz	Pz	Fz	Cz	Pz	Fz	Cz	Pz
	active	active	active	active	active	active	pasive	pasive	pasive	pasive	pasive	pasive
time	standard	standard	standard	deviant	deviant	deviant	standard	standard	standard	deviant	deviant	deviant
-200	-0.123	-0.14	-0.208	0.071	0.243	0.405	-0.217	0.041	0.17	-0.339	-0.171	-0.035
-196	-0.173	-0.18	-0.22	0.112	0.299	0.357	-0.235	0.052	0.191	-0.312	-0.121	-0.026
-192	-0.202	-0.199	-0.223	0.193	0.386	0.314	-0.26	0.049	0.196	-0.256	-0.065	-0.011
-188	-0.206	-0.2	-0.223	0.292	0.488	0.279	-0.273	0.042	0.195	-0.183	-0.02	-0.005
-184	-0.187	-0.194	-0.225	0.369	0.562	0.234	-0.266	0.039	0.192	-0.136	-0.027	-0.039
-180	-0.144	-0.181	-0.226	0.398	0.584	0.164	-0.247	0.036	0.183	-0.123	-0.096	-0.122
-176	-0.098	-0.167	-0.225	0.386	0.564	0.077	-0.234	0.028	0.165	-0.14	-0.218	-0.258
-172	-0.07	-0.157	-0.225	0.366	0.535	0.006	-0.232	0.012	0.135	-0.188	-0.383	-0.443
-168	-0.059	-0.153	-0.223	0.351	0.516	-0.03	-0.239	-0.01	0.093	-0.259	-0.572	-0.658
-164	-0.055	-0.147	-0.213	0.337	0.502	-0.035	-0.249	-0.029	0.051	-0.339	-0.753	-0.866
-160	-0.054	-0.138	-0.198	0.333	0.489	-0.019	-0.256	-0.043	0.011	-0.413	-0.894	-1.037
-156	-0.062	-0.129	-0.182	0.343	0.476	0.004	-0.254	-0.051	-0.022	-0.47	-0.978	-1.145
-152	-0.077	-0.124	-0.165	0.343	0.447	0.022	-0.254	-0.059	-0.05	-0.503	-1.004	-1.175
-148	-0.094	-0.123	-0.148	0.327	0.398	0.037	-0.273	-0.084	-0.078	-0.517	-0.992	-1.142
-144	-0.099	-0.118	-0.127	0.328	0.359	0.066	-0.308	-0.125	-0.107	-0.516	-0.954	-1.065
-140	-0.094	-0.103	-0.1	0.356	0.356	0.119	-0.341	-0.165	-0.131	-0.484	-0.874	-0.948
-136	-0.081	-0.076	-0.066	0.371	0.36	0.177	-0.357	-0.181	-0.143	-0.417	-0.751	-0.804
-132	-0.057	-0.038	-0.029	0.329	0.323	0.201	-0.344	-0.164	-0.13	-0.329	-0.607	-0.662
-128	-0.03	-0.001	0.001	0.216	0.225	0.173	-0.294	-0.109	-0.086	-0.23	-0.448	-0.534
-124	-0.018	0.027	0.016	0.042	0.07	0.099	-0.224	-0.032	-0.027	-0.113	-0.273	-0.416
-120	-0.033	0.04	0.016	-0.158	-0.115	0.002	-0.162	0.042	0.028	0.009	-0.101	-0.299
-116	-0.073	0.032	0	-0.332	-0.288	-0.096	-0.112	0.098	0.071	0.113	0.044	-0.183
-112	-0.113	0.017	-0.017	-0.455	-0.424	-0.177	-0.069	0.137	0.096	0.164	0.142	-0.083
-108	-0.138	0.009	-0.019	-0.534	-0.514	-0.236	-0.028	0.161	0.103	0.152	0.189	-0.002
-104	-0.144	0.012	-0.003	-0.569	-0.554	-0.274	0.021	0.182	0.104	0.1	0.196	0.058
-100	-0.126	0.025	0.025	-0.566	-0.553	-0.295	0.074	0.204	0.114	0.043	0.183	0.098
-96	-0.086	0.044	0.059	-0.535	-0.522	-0.298	0.117	0.222	0.133	0.009	0.162	0.117
-92	-0.038	0.068	0.091	-0.482	-0.473	-0.292	0.145	0.237	0.165	-0.017	0.136	0.112
-88	0.008	0.094	0.119	-0.425	-0.431	-0.297	0.148	0.242	0.199	-0.039	0.111	0.098
-84	0.053	0.118	0.142	-0.375	-0.393	-0.304	0.129	0.235	0.23	-0.038	0.102	0.09
-80	0.101	0.138	0.161	-0.338	-0.347	-0.293	0.103	0.222	0.254	-0.021	0.106	0.088
-76	0.143	0.152	0.178	-0.32	-0.299	-0.261	0.075	0.201	0.264	-0.014	0.112	0.089
-72	0.163	0.151	0.185	-0.3	-0.239	-0.198	0.05	0.171	0.254	-0.004	0.125	0.102
-68	0.15	0.131	0.173	-0.241	-0.139	-0.091	0.037	0.139	0.224	0.028	0.146	0.131
-64	0.112	0.1	0.149	-0.13	-0.004	0.045	0.027	0.104	0.179	0.058	0.149	0.158
-60	0.07	0.07	0.119	-0.002	0.13	0.173	0.014	0.061	0.125	0.051	0.116	0.165
-56	0.037	0.04	0.081	0.123	0.247	0.277	-0.005	0.009	0.068	0.001	0.044	0.145
-52	0.022	0.012	0.034	0.251	0.352	0.354	-0.033	-0.05	0.007	-0.062	-0.054	0.093
-48	0.031	-0.01	-0.013	0.357	0.428	0.388	-0.066	-0.114	-0.058	-0.117	-0.16	0.011
-44	0.048	-0.029	-0.058	0.42	0.458	0.377	-0.102	-0.173	-0.123	-0.18	-0.27	-0.088
-40	0.051	-0.053	-0.103	0.437	0.434	0.322	-0.126	-0.217	-0.185	-0.253	-0.371	-0.189
-36	0.045	-0.075	-0.14	0.419	0.374	0.241	-0.125	-0.234	-0.236	-0.303	-0.437	-0.272
-32	0.036	-0.089	-0.162	0.383	0.305	0.162	-0.111	-0.228	-0.27	-0.287	-0.439	-0.31
-28	0.006	-0.109	-0.178	0.327	0.231	0.093	-0.093	-0.209	-0.282	-0.207	-0.376	-0.297
-24	-0.047	-0.136	-0.19	0.262	0.156	0.034	-0.074	-0.189	-0.276	-0.093	-0.269	-0.252
-20	-0.101	-0.156	-0.191	0.209	0.102	-0.007	-0.055	-0.167	-0.252	0.044	-0.126	-0.189
-16	-0.146	-0.16	-0.178	0.17	0.063	-0.035	-0.043	-0.145	-0.211	0.2	0.038	-0.112
-12	-0.177	-0.147	-0.15	0.14	0.036	-0.052	-0.036	-0.126	-0.16	0.328	0.193	-0.023
-8	-0.186	-0.114	-0.106	0.114	0.03	-0.043	-0.028	-0.107	-0.106	0.408	0.327	0.068
-4	-0.167	-0.064	-0.049	0.104	0.055	0.001	-0.022	-0.086	-0.056	0.466	0.451	0.167
0	-0.139	-0.017	0.003	0.134	0.117	0.08	-0.016	-0.066	-0.02	0.522	0.563	0.274
4	-0.121	0.012	0.043	0.182	0.189	0.176	-0.012	-0.049	0	0.572	0.649	0.372
8	-0.109	0.03	0.072	0.227	0.252	0.277	-0.011	-0.034	0.012	0.608	0.714	0.449
12	-0.098	0.038	0.085	0.291	0.32	0.391	-0.014	-0.018	0.02	0.633	0.765	0.515
16	-0.087	0.037	0.081	0.366	0.396	0.521	-0.025	-0.01	0.022	0.648	0.806	0.567
20	-0.079	0.033	0.071	0.422	0.467	0.653	-0.052	-0.019	0.012	0.643	0.832	0.6
24	-0.075	0.025	0.058	0.469	0.542	0.783	-0.084	-0.037	-0.015	0.605	0.831	0.613
28	-0.072	0.018	0.046	0.513	0.619	0.896	-0.106	-0.058	-0.055	0.529	0.798	0.596
32	-0.065	0.014	0.042	0.531	0.671	0.969	-0.115	-0.076	-0.102	0.411	0.714	0.528
36	-0.046	0.017	0.049	0.522	0.685	0.993	-0.103	-0.083	-0.143	0.26	0.574	0.419
40	-0.013	0.034	0.066	0.498	0.662	0.965	-0.079	-0.075	-0.175	0.097	0.395	0.289
44	0.023	0.063	0.086	0.462	0.618	0.895	-0.052	-0.06	-0.195	-0.081	0.189	0.136
48	0.048	0.09	0.096	0.422	0.559	0.789	-0.032	-0.044	-0.204	-0.273	-0.027	-0.025
52	0.062	0.111	0.094	0.38	0.482	0.654	-0.019	-0.032	-0.206	-0.458	-0.231	-0.18
56	0.066	0.12	0.079	0.326	0.395	0.507	-0.006	-0.017	-0.201	-0.609	-0.397	-0.313
60	0.068	0.119	0.056	0.262	0.313	0.371	0.015	0.005	-0.182	-0.715	-0.507	-0.411
64	0.066	0.106	0.03	0.192	0.24	0.266	0.044	0.041	-0.146	-0.77	-0.565	-0.471
68	0.053	0.078	-0.004	0.108	0.172	0.188	0.07	0.086	-0.098	-0.749	-0.564	-0.484
72	0.032	0.039	-0.039	0.03	0.111	0.127	0.09	0.139	-0.038	-0.664	-0.517	-0.459
76	0.005	0	-0.073	-0.012	0.065	0.078	0.104	0.198	0.036	-0.568	-0.458	-0.419
80	-0.033	-0.04	-0.107	-0.024	0.03	0.033	0.106	0.248	0.113	-0.487	-0.407	-0.378
84	-0.067	-0.076	-0.136	-0.028	-0.004	-0.01	0.109	0.289	0.187	-0.413	-0.364	-0.34
88	-0.089	-0.097	-0.154	-0.023	-0.027	-0.04	0.136	0.336	0.262	-0.359	-0.334	-0.299
92	-0.106	-0.106	-0.163	-0.007	-0.03	-0.045	0.188	0.392	0.333	-0.342	-0.322	-0.258
96	-0.118	-0.103	-0.168	0	-0.011	-0.018	0.247	0.448	0.387	-0.331	-0.29	-0.204
100	-0.117	-0.091	-0.172	0.002	0.032	0.053	0.309	0.499	0.422	-0.291	-0.212	-0.112
104	-0.101	-0.065	-0.175	0.021	0.111	0.178	0.368	0.548	0.443	-0.229	-0.101	0.019
108	-0.063	-0.017	-0.168	0.057	0.22	0.353	0.408	0.588	0.452	-0.147	0.044	0.187
112	-0.004	0.055	-0.146	0.1	0.355	0.571	0.423	0.613	0.448	-0.047	0.212	0.386
116	0.064	0.142	-0.107	0.139	0.501	0.808	0.424	0.629	0.443	0.054	0.373	0.59
120	0.133	0.235	-0.052	0.174	0.64	1.037	0.416	0.638	0.447	0.137	0.512	0.783
124	0.193	0.323	0.012	0.22	0.771	1.243	0.391	0.629	0.457	0.172	0.62	0.958
128	0.235	0.386	0.069	0.278	0.891	1.416	0.341	0.593	0.461	0.149	0.687	01,01,2017
132	0.249	0.41	0.103	0.334	0.995	1.553	0.279	0.534	0.454	0.082	0.702	1.199
136	0.224	0.387	0.106	0.376	1.082	1.656	0.223	0.463	0.441	-0.025	0.665	1.255
140	0.151	0.314	0.066	0.394	1.137	1.712	0.17	0.387	0.419	-0.176	0.571	1.268
144	0.023	0.181	-0.032	0.374	1.143	1.708	0.106	0.303	0.383	-0.37	0.421	1.226
148	-0.153	-0.012	-0.194	0.305	1.087	1.641	0.02	0.207	0.343	-0.591	0.227	1.134
152	-0.366	-0.259	-0.416	0.197	0.972	1.523	-0.094	0.094	0.294	-0.819	0.008	1.013
156	-0.598	-0.544	-0.694	0.056	0.798	1.362	-0.244	-0.035	0.232	-1.049	-0.222	0.871
160	-0.825	-0.845	-1.012	-0.126	0.573	1.159	-0.419	-0.173	0.164	-1.266	-0.449	0.708
164	-1.044	-1.145	-1.354	-0.325	0.34	0.942	-0.592	-0.3	0.101	-1.437	-0.642	0.541
168	-1.239	-1.423	-1.698	-0.517	0.13	0.72	-0.721	-0.387	0.057	-1.544	-0.783	0.379
172	-1.394	-1.657	-2.019	-0.712	-0.061	0.486	-0.794	-0.426	0.04	-1.587	-0.868	0.228
176	-1.502	-1.829	-2.293	-0.869	-0.204	0.266	-0.823	-0.423	0.048	-1.552	-0.878	0.12
180	-1.544	-1.924	-2.497	-0.941	-0.256	0.095	-0.805	-0.374	0.074	-1.438	-0.81	0.067
184	-1.494	-1.912	-2.595	-0.915	-0.208	-0.009	-0.732	-0.278	0.113	-1.256	-0.673	0.058
188	-1.346	-1.774	-2.565	-0.783	-0.068	-0.041	-0.61	-0.147	0.158	-1.005	-0.456	0.101
192	-1.111	-1.512	-2.4	-0.54	0.168	0.009	-0.454	0.009	0.208	-0.693	-0.161	0.192
196	-0.801	-1.141	-2.104	-0.202	0.495	0.147	-0.265	0.188	0.273	-0.35	0.188	0.306
200	-0.442	-0.692	-1.695	0.173	0.872	0.355	-0.055	0.38	0.358	0.007	0.569	0.431
204	-0.074	-0.199	-1.199	0.538	1.261	0.618	0.15	0.574	0.461	0.385	0.962	0.572
208	0.273	0.302	-0.641	0.868	1.647	0.935	0.339	0.767	0.585	0.768	01,01,1934	0.722
212	0.583	0.782	-0.049	01,01,2016	2.031	1.305	0.506	0.956	0.728	1.123	1.682	0.875
216	0.851	1.227	0.551	1.422	02,04,2017	1.717	0.655	1.136	0.879	1.407	01,01,1996	01,03,2017
220	1.069	1.626	1.135	1.653	2.739	2.149	0.792	1.301	1.028	1.599	2.159	1.174
224	1.237	1.973	1.677	1.824	3.013	2.568	0.914	1.445	1.173	1.692	2.271	1.291
228	1.362	2.258	2.145	1.907	3.186	2.936	1.013	1.561	1.317	1.687	2.295	1.394
232	1.445	2.478	2.523	1.893	3.249	01,03,2023	1.077	1.645	1.453	1.616	2.243	1.493
236	1.488	2.639	2.808	1.793	3.219	3.452	1.105	1.696	1.579	1.514	2.147	1.581
240	1.503	2.749	3.009	1.624	3.115	03,06,2017	01,01,2017	1.724	1.693	1.402	2.033	1.661
244	1.505	2.823	3.139	1.409	2.964	3.684	1.058	01,01,1973	1.792	1.291	1.914	1.738
248	1.508	2.871	3.215	1.201	2.827	3.744	0.984	1.716	1.867	1.169	1.797	01,01,1981
252	01,01,1953	2.914	3.257	1.033	2.738	03,08,2017	0.9	1.689	1.919	1.035	1.693	1.872
256	1.576	2.962	3.285	0.908	2.697	3.848	0.818	1.659	1.958	0.92	1.622	01,01,1993
260	1.648	03,02,2017	3.306	0.862	2.729	3.913	0.739	1.622	1.983	0.838	1.585	1.987
264	1.751	03,01,2017	3.336	0.925	2.857	4.027	0.673	1.584	1.993	0.771	1.573	2.046
268	1.882	3.202	3.381	1.094	3.077	4.194	0.627	1.551	1.985	0.715	1.586	2.104
272	2.027	3.314	3.437	1.368	01,03,1938	4.418	0.597	1.518	1.958	0.674	1.608	2.137
276	2.175	3.424	3.496	1.736	3.758	04,07,2017	0.578	1.485	1.906	0.632	1.613	2.139
280	2.319	3.517	3.549	2.156	4.184	5.025	0.56	1.446	1.832	0.608	1.609	2.132
284	2.441	3.576	3.582	2.599	4.635	5.376	0.544	1.393	1.737	0.637	1.621	2.127
288	2.537	3.601	3.596	3.044	5.093	5.737	0.539	1.331	1.626	0.702	1.641	2.105
292	2.608	3.599	3.595	3.436	5.511	6.078	0.536	1.256	1.501	0.773	1.647	2.048
296	2.656	3.577	3.579	3.731	5.848	6.374	0.517	1.167	01,01,1937	0.846	1.634	1.946
300	2.683	3.535	3.549	3.946	6.112	6.629	0.487	1.066	01,01,2024	0.891	1.588	01,01,1979
304	2.682	3.468	3.503	4.104	6.317	6.842	0.443	0.957	1.117	0.878	1.492	1.588
308	2.644	3.367	3.436	01,04,2022	6.471	7.014	0.381	0.841	1.005	0.826	1.363	1.361
312	2.567	3.231	3.347	4.306	6.594	7.159	0.317	0.734	0.908	0.769	1.231	1.145
316	2.458	3.069	01,03,2024	01,04,1938	6.696	7.291	0.265	0.643	0.826	0.727	1.127	0.982
320	2.323	2.886	3.118	4.449	6.779	7.414	0.233	0.573	0.764	0.709	1.073	0.894
324	2.172	2.688	2.987	4.501	6.836	7.528	0.223	0.527	0.724	0.716	01,07,2017	0.866
328	2.016	2.489	2.855	4.531	6.866	7.632	0.223	0.497	0.7	0.741	1.102	0.878
332	1.856	2.295	2.728	4.549	01,06,1988	7.729	0.215	0.47	0.684	0.773	1.149	0.928
336	1.688	2.107	2.607	4.557	6.893	7.827	0.191	0.435	0.67	0.793	1.188	1
340	1.521	1.929	2.492	4.563	6.916	7.924	0.148	0.379	0.645	0.779	1.192	01,07,2017
344	1.371	1.776	2.387	01,04,1957	6.959	8.022	0.075	0.302	0.611	0.73	1.157	01,01,2013
348	1.241	1.645	2.289	4.587	7.027	8.128	-0.018	0.211	0.571	0.673	1.102	1.183
352	1.133	1.531	2.196	4.659	7.136	8.253	-0.113	0.115	0.53	0.639	1.057	1.235
356	1.062	1.439	2.117	4.805	7.295	8.404	-0.198	0.022	0.49	0.64	1.048	1.292
360	1.025	1.367	2.055	4.987	7.477	8.566	-0.271	-0.061	0.45	0.671	01,08,2017	1.345
364	1.005	1.315	2.007	5.168	7.646	8.719	-0.332	-0.122	0.407	0.726	1.145	1.391
368	1.003	1.285	1.975	5.344	7.789	01,08,1986	-0.369	-0.155	0.369	0.794	1.233	1.448
372	1.017	1.276	1.954	5.501	7.904	8.986	-0.378	-0.162	0.344	0.851	01,01,1932	1.511
376	1.045	1.282	1.937	5.611	7.977	9.084	-0.365	-0.144	0.338	0.884	1.384	1.554
380	1.083	1.305	1.925	5.678	8.025	9.163	-0.328	-0.106	0.351	0.908	1.426	1.569
384	1.128	1.342	1.916	01,05,1973	8.079	9.235	-0.271	-0.055	0.375	0.926	1.448	01,01,1956
388	1.189	01,01,1939	1.908	5.773	8.147	09,03,2017	-0.21	-0.005	0.406	0.948	1.457	1.529
392	01,01,2028	1.458	1.907	5.804	8.224	9.355	-0.16	0.034	0.436	0.999	1.473	1.481
396	1.393	1.547	1.915	5.847	8.313	9.395	-0.124	0.056	0.451	1.064	1.496	1.427
400	1.519	01,01,1965	1.931	5.913	8.394	9.414	-0.089	0.069	0.443	1.125	1.507	1.374
404	1.657	1.764	1.954	5.993	8.453	9.414	-0.051	0.076	0.416	1.194	1.505	1.308
408	01,01,1979	1.872	1.977	6.072	8.492	9.405	-0.017	0.073	0.368	1.259	1.487	1.222
412	1.895	1.954	1.988	6.113	8.498	9.385	0.018	0.066	0.304	1.282	01,01,1944	1.117
416	1.962	2.002	1.983	6.081	8.453	9.341	0.054	0.063	0.243	1.252	1.365	1.001
420	01,01,1999	2.013	1.961	5.995	8.375	9.287	0.073	0.061	0.202	1.197	1.282	0.887
424	1.981	1.987	1.925	5.888	8.288	9.236	0.073	0.054	0.177	1.132	1.202	0.795
428	1.933	1.924	1.879	5.736	8.161	9.163	0.065	0.036	0.158	1.046	1.127	0.729
432	1.848	1.833	1.822	5.518	7.969	09,04,2017	0.046	0.007	0.136	0.929	1.051	0.678
436	1.731	1.724	1.758	5.286	7.746	8.886	0.009	-0.026	0.108	0.808	0.975	0.628
440	01,01,1959	1.603	1.684	5.058	7.509	8.712	-0.034	-0.055	0.075	0.707	0.908	0.581
444	1.436	1.478	1.606	4.803	7.235	8.502	-0.063	-0.068	0.048	0.629	0.858	0.552
448	1.291	1.368	1.536	4.533	6.935	8.265	-0.064	-0.057	0.033	0.583	0.821	0.546
452	1.167	01,01,2028	01,01,1948	4.269	01,06,1963	8.019	-0.045	-0.028	0.027	0.562	0.777	0.551
456	1.062	1.208	1.435	3.988	6.309	7.765	-0.023	0.003	0.024	0.557	0.72	0.552
460	0.976	01,01,2015	1.404	3.675	5.966	7.497	-0.008	0.017	0.015	0.565	0.666	0.553
464	0.899	1.098	1.378	3.339	5.604	7.207	-0.017	0.01	-0.001	0.56	0.615	0.547
468	0.816	1.042	1.348	3	5.235	01,06,1989	-0.054	-0.017	-0.024	0.51	0.551	0.519
472	0.716	0.977	1.312	2.689	4.879	6.568	-0.108	-0.053	-0.053	0.445	0.492	0.479
476	0.603	0.9	1.267	2.425	4.553	6.262	-0.162	-0.09	-0.089	0.399	0.462	0.45
480	0.49	0.815	1.212	2.187	01,04,2024	5.961	-0.203	-0.127	-0.126	0.364	0.447	0.429
484	0.38	0.722	1.144	1.948	3.917	5.648	-0.227	-0.156	-0.153	0.336	0.439	0.407
488	0.278	0.628	1.065	1.696	3.573	5.319	-0.247	-0.185	-0.17	0.346	0.455	0.388
492	0.186	0.543	0.986	1.423	3.207	4.976	-0.273	-0.22	-0.178	0.398	0.495	0.365
496	0.104	0.471	0.909	1.123	2.816	4.617	-0.303	-0.259	-0.178	0.439	0.516	0.318
500	0.035	0.417	0.839	0.788	2.401	4.244	-0.35	-0.307	-0.183	0.419	0.489	0.244
504	-0.028	0.375	0.779	0.43	1.995	3.893	-0.426	-0.368	-0.2	0.347	0.417	0.161
508	-0.092	0.332	0.724	0.081	1.625	01,03,1958	-0.514	-0.432	-0.224	0.252	0.315	0.079
512	-0.15	0.286	0.675	-0.252	1.282	3.286	-0.594	-0.489	-0.244	0.146	0.198	0.018
516	-0.199	0.233	0.63	-0.585	0.947	2.995	-0.654	-0.534	-0.254	0.056	0.096	0.012
520	-0.254	0.168	0.585	-0.914	0.626	01,02,1971	-0.682	-0.562	-0.264	-0.003	0.021	0.052
524	-0.309	0.104	0.546	-1.196	0.348	2.456	-0.684	-0.58	-0.286	-0.039	-0.042	0.099
528	-0.346	0.057	0.519	-1.408	0.134	2.256	-0.666	-0.587	-0.321	-0.067	-0.099	0.135
532	-0.37	0.024	0.504	-1.572	-0.025	2.107	-0.646	-0.589	-0.357	-0.097	-0.148	0.152
536	-0.391	-0.002	0.495	-1.695	-0.143	1.998	-0.632	-0.589	-0.382	-0.127	-0.185	0.144
540	-0.414	-0.027	0.488	-1.768	-0.222	1.923	-0.619	-0.583	-0.387	-0.151	-0.207	0.128
544	-0.442	-0.058	0.476	-1.818	-0.284	1.865	-0.613	-0.573	-0.371	-0.177	-0.217	0.114
548	-0.481	-0.1	0.453	-1.867	-0.334	01,01,1982	-0.613	-0.562	-0.342	-0.219	-0.224	0.1
552	-0.519	-0.138	0.425	-1.904	-0.351	1.799	-0.608	-0.545	-0.307	-0.275	-0.234	0.086
556	-0.538	-0.156	0.406	-1.927	-0.33	1.803	-0.593	-0.517	-0.278	-0.319	-0.236	0.073
560	-0.54	-0.152	0.4	-1.946	-0.29	1.811	-0.563	-0.478	-0.252	-0.323	-0.213	0.064
564	-0.535	-0.136	0.408	-1.975	-0.256	1.803	-0.513	-0.419	-0.208	-0.274	-0.164	0.056
568	-0.528	-0.115	0.426	-2.018	-0.248	01,01,1977	-0.442	-0.342	-0.145	-0.198	-0.103	0.054
572	-0.534	-0.107	0.443	-2.071	-0.274	1.706	-0.374	-0.264	-0.076	-0.129	-0.042	0.065
576	-0.56	-0.119	0.45	-2.117	-0.328	01,01,1961	-0.319	-0.189	-0.003	-0.087	0.013	0.085
580	-0.591	-0.142	0.446	-2.142	-0.393	1.492	-0.266	-0.111	0.075	-0.081	0.053	0.095
584	-0.615	-0.169	0.427	-2.155	-0.469	1.351	-0.22	-0.036	0.145	-0.101	0.086	0.096
588	-0.633	-0.199	0.389	-2.184	-0.573	1.177	-0.181	0.032	0.197	-0.113	0.135	0.108
592	-0.653	-0.236	0.327	-2.257	-0.717	0.968	-0.14	0.092	0.237	-0.094	0.196	0.13
596	-0.675	-0.281	0.246	-2.352	-0.876	0.756	-0.1	0.14	0.261	-0.049	0.244	0.148
600	-0.703	-0.338	0.145	-2.406	-1.002	0.583	-0.073	0.164	0.259	-0.011	0.26	0.154
604	-0.738	-0.409	0.033	-2.415	-1.084	0.46	-0.061	0.168	0.238	0.004	0.238	0.152
608	-0.769	-0.482	-0.072	-2.417	-1.148	0.36	-0.048	0.162	0.206	0	0.182	0.141
612	-0.793	-0.55	-0.16	-2.409	-1.192	0.281	-0.038	0.153	0.166	-0.033	0.101	0.108
616	-0.804	-0.607	-0.229	-2.398	-1.219	0.218	-0.043	0.14	0.12	-0.101	0.003	0.052
620	-0.799	-0.642	-0.268	-2.413	-1.254	0.145	-0.063	0.121	0.073	-0.192	-0.104	-0.016
624	-0.78	-0.65	-0.269	-2.446	-1.294	0.064	-0.092	0.1	0.031	-0.278	-0.201	-0.091
628	-0.753	-0.63	-0.239	-2.446	-1.31	-0.003	-0.118	0.079	-0.006	-0.342	-0.269	-0.155
632	-0.726	-0.591	-0.187	-2.393	-1.289	-0.043	-0.134	0.059	-0.034	-0.401	-0.319	-0.199
636	-0.698	-0.543	-0.125	-2.328	-1.257	-0.073	-0.138	0.044	-0.054	-0.459	-0.352	-0.233
640	-0.671	-0.496	-0.062	-2.289	-1.24	-0.11	-0.14	0.028	-0.066	-0.48	-0.349	-0.248
644	-0.657	-0.468	-0.017	-2.268	-1.225	-0.134	-0.153	0.004	-0.075	-0.465	-0.318	-0.243
648	-0.657	-0.465	0.003	-2.247	-1.196	-0.128	-0.18	-0.027	-0.082	-0.451	-0.291	-0.239
652	-0.666	-0.48	0.006	-2.205	-1.14	-0.09	-0.224	-0.064	-0.085	-0.433	-0.275	-0.242
656	-0.686	-0.514	-0.006	-2.124	-1.044	-0.005	-0.282	-0.105	-0.086	-0.401	-0.253	-0.238
660	-0.719	-0.562	-0.032	-2.018	-0.918	0.125	-0.329	-0.135	-0.08	-0.37	-0.227	-0.218
664	-0.753	-0.606	-0.061	-1.907	-0.785	0.274	-0.361	-0.15	-0.064	-0.358	-0.21	-0.187
668	-0.779	-0.642	-0.094	-1.794	-0.669	0.411	-0.392	-0.161	-0.051	-0.377	-0.217	-0.165
672	-0.805	-0.676	-0.134	-1.696	-0.6	0.505	-0.424	-0.176	-0.051	-0.414	-0.245	-0.162
676	-0.83	-0.708	-0.181	-1.61	-0.573	0.554	-0.448	-0.196	-0.062	-0.449	-0.287	-0.182
680	-0.849	-0.732	-0.231	-1.524	-0.565	0.566	-0.464	-0.221	-0.084	-0.483	-0.343	-0.224
684	-0.858	-0.745	-0.279	-1.454	-0.58	0.536	-0.475	-0.245	-0.113	-0.518	-0.392	-0.27
688	-0.851	-0.74	-0.319	-1.412	-0.614	0.466	-0.479	-0.263	-0.138	-0.52	-0.389	-0.304
692	-0.82	-0.713	-0.345	-1.409	-0.661	0.368	-0.476	-0.273	-0.153	-0.47	-0.322	-0.313
696	-0.772	-0.667	-0.358	-1.439	-0.728	0.245	-0.464	-0.272	-0.158	-0.395	-0.209	-0.288
700	-0.727	-0.617	-0.364	-1.475	-0.807	0.113	-0.443	-0.263	-0.159	-0.309	-0.068	-0.226
704	-0.691	-0.575	-0.371	-1.494	-0.889	-0.029	-0.427	-0.257	-0.167	-0.212	0.087	-0.132
708	-0.662	-0.545	-0.374	-1.492	-0.976	-0.179	-0.409	-0.256	-0.185	-0.108	0.232	-0.016
712	-0.639	-0.518	-0.367	-1.472	-1.05	-0.31	-0.378	-0.249	-0.203	-0.018	0.335	0.095
716	-0.624	-0.493	-0.349	-1.447	-1.111	-0.416	-0.343	-0.232	-0.212	0.033	0.372	0.17
720	-0.613	-0.47	-0.323	-1.426	-1.171	-0.505	-0.311	-0.212	-0.213	0.044	0.339	0.196
724	-0.601	-0.445	-0.287	-1.401	-1.217	-0.565	-0.288	-0.194	-0.211	-0.002	0.232	0.155
728	-0.599	-0.426	-0.247	-1.364	-1.225	-0.572	-0.276	-0.18	-0.211	-0.105	0.076	0.054
732	-0.613	-0.418	-0.21	-1.325	-1.205	-0.547	-0.278	-0.173	-0.216	-0.23	-0.086	-0.069
736	-0.619	-0.412	-0.17	-1.317	-1.201	-0.539	-0.295	-0.179	-0.231	-0.357	-0.228	-0.189
740	-0.614	-0.404	-0.125	-1.352	-1.233	-0.561	-0.315	-0.197	-0.256	-0.455	-0.333	-0.294
744	-0.611	-0.402	-0.084	-1.413	-1.285	-0.593	-0.33	-0.219	-0.285	-0.528	-0.405	-0.389
748	-0.617	-0.415	-0.062	-1.485	-1.342	-0.612	-0.342	-0.243	-0.314	-0.605	-0.479	-0.492
752	-0.63	-0.441	-0.062	-1.542	-1.383	-0.603	-0.36	-0.275	-0.343	-0.681	-0.552	-0.586
756	-0.645	-0.472	-0.079	-1.551	-1.377	-0.55	-0.385	-0.315	-0.381	-0.745	-0.609	-0.655
760	-0.658	-0.509	-0.115	-1.5	-1.319	-0.456	-0.411	-0.356	-0.425	-0.8	-0.66	-0.714
764	-0.665	-0.545	-0.162	-1.406	-1.236	-0.349	-0.435	-0.392	-0.46	-0.832	-0.702	-0.762
768	-0.666	-0.577	-0.209	-1.309	-1.167	-0.271	-0.452	-0.42	-0.485	-0.816	-0.725	-0.788
772	-0.668	-0.601	-0.249	-1.243	-1.125	-0.235	-0.457	-0.436	-0.5	-0.764	-0.738	-0.801
776	-0.671	-0.617	-0.279	-1.198	-1.097	-0.222	-0.448	-0.432	-0.501	-0.693	-0.747	-0.819
780	-0.683	-0.628	-0.302	-1.165	-1.065	-0.215	-0.434	-0.418	-0.493	-0.604	-0.744	-0.852
784	-0.696	-0.63	-0.317	-1.145	-1.022	-0.212	-0.417	-0.397	-0.477	-0.519	-0.733	-0.9
788	-0.7	-0.624	-0.327	-1.129	-0.977	-0.218	-0.388	-0.369	-0.452	-0.459	-0.728	-0.951
792	-0.696	-0.616	-0.335	-1.107	-0.951	-0.247	-0.342	-0.325	-0.414	-0.428	-0.728	-0.995
796	-0.695	-0.622	-0.352	-1.09	-0.964	-0.314	-0.288	-0.273	-0.368	-0.43	-0.733	-1.028
800	-0.709	-0.652	-0.387	-1.082	-1.014	-0.413	-0.241	-0.229	-0.325	-0.443	-0.732	-1.034
804	-0.73	-0.69	-0.427	-1.08	-1.079	-0.526	-0.206	-0.196	-0.287	-0.429	-0.697	-0.988
808	-0.751	-0.724	-0.463	-1.093	-1.157	-0.655	-0.191	-0.179	-0.264	-0.378	-0.613	-0.897
812	-0.771	-0.75	-0.493	-1.11	-1.236	-0.787	-0.207	-0.187	-0.257	-0.305	-0.497	-0.794
816	-0.789	-0.765	-0.517	-1.105	-1.295	-0.903	-0.247	-0.215	-0.262	-0.229	-0.373	-0.696
820	-0.792	-0.757	-0.522	-1.094	-1.348	-1.008	-0.3	-0.255	-0.268	-0.17	-0.266	-0.609
824	-0.773	-0.726	-0.505	-1.108	-1.418	-1.108	-0.355	-0.29	-0.266	-0.151	-0.2	-0.544
828	-0.749	-0.688	-0.475	-1.14	-1.508	-1.191	-0.416	-0.328	-0.261	-0.159	-0.178	-0.498
832	-0.732	-0.657	-0.443	-1.182	-1.611	-1.256	-0.494	-0.376	-0.26	-0.195	-0.203	-0.481
836	-0.718	-0.635	-0.411	-1.223	-1.704	-1.301	-0.575	-0.425	-0.262	-0.263	-0.275	-0.498
840	-0.708	-0.621	-0.377	-1.256	-1.759	-1.315	-0.642	-0.465	-0.267	-0.333	-0.367	-0.533
844	-0.709	-0.618	-0.344	-1.284	-1.781	-1.305	-0.684	-0.49	-0.277	-0.399	-0.468	-0.588
848	-0.723	-0.626	-0.318	-1.304	-1.781	-1.29	-0.692	-0.501	-0.295	-0.451	-0.57	-0.67
852	-0.741	-0.64	-0.3	-1.303	-1.752	-1.264	-0.67	-0.497	-0.317	-0.474	-0.656	-0.768
856	-0.752	-0.648	-0.285	-1.292	-1.712	-1.233	-0.621	-0.477	-0.332	-0.489	-0.736	-0.881
860	-0.754	-0.65	-0.275	-1.309	-1.71	-1.228	-0.555	-0.444	-0.338	-0.508	-0.816	-1.009
864	-0.753	-0.654	-0.282	-1.375	-1.763	-1.254	-0.492	-0.402	-0.337	-0.542	-0.896	-1.137
868	-0.748	-0.662	-0.308	-1.48	-1.845	-1.292	-0.429	-0.349	-0.325	-0.6	-0.973	-1.246
872	-0.725	-0.666	-0.342	-1.621	-1.944	-1.329	-0.359	-0.286	-0.302	-0.645	-1.026	-1.317
876	-0.682	-0.66	-0.376	-1.785	-2.044	-1.359	-0.297	-0.227	-0.279	-0.636	-1.026	-1.342
880	-0.635	-0.655	-0.415	-1.91	-2.103	-1.366	-0.25	-0.184	-0.264	-0.578	-0.968	-1.317
884	-0.594	-0.657	-0.459	-1.941	-2.091	-1.337	-0.215	-0.158	-0.256	-0.491	-0.867	-1.256
888	-0.553	-0.661	-0.497	-1.893	-2.024	-1.29	-0.187	-0.147	-0.259	-0.402	-0.755	-1.186
892	-0.519	-0.661	-0.522	-1.822	-1.943	-1.253	-0.161	-0.148	-0.274	-0.332	-0.651	-1.11
896	-0.505	-0.666	-0.539	-1.775	-1.881	-1.243	-0.13	-0.156	-0.293	-0.284	-0.564	-1.026
900	-0.505	-0.676	-0.55	-1.768	-1.862	-1.277	-0.104	-0.175	-0.32	-0.24	-0.492	-0.94
904	-0.502	-0.681	-0.55	-1.766	-1.873	-1.345	-0.104	-0.215	-0.36	-0.2	-0.43	-0.86
908	-0.499	-0.68	-0.54	-1.713	-1.862	-1.415	-0.122	-0.27	-0.406	-0.157	-0.354	-0.776
912	-0.501	-0.678	-0.523	-1.601	-1.803	-1.468	-0.152	-0.325	-0.447	-0.101	-0.253	-0.676
916	-0.511	-0.68	-0.508	-1.449	-1.703	-1.492	-0.193	-0.369	-0.481	-0.06	-0.144	-0.562
920	-0.535	-0.689	-0.499	-1.28	-1.58	-1.478	-0.229	-0.397	-0.501	-0.047	-0.046	-0.442
924	-0.559	-0.694	-0.493	-1.119	-1.456	-1.445	-0.257	-0.409	-0.502	-0.051	0.038	-0.333
928	-0.572	-0.689	-0.482	-0.993	-1.362	-1.418	-0.274	-0.408	-0.478	-0.052	0.108	-0.235
932	-0.58	-0.679	-0.472	-0.904	-1.313	-1.416	-0.28	-0.398	-0.434	-0.03	0.169	-0.155
936	-0.575	-0.662	-0.467	-0.835	-1.301	-1.445	-0.273	-0.378	-0.375	-0.001	0.211	-0.113
940	-0.546	-0.633	-0.457	-0.787	-1.313	-1.496	-0.242	-0.341	-0.3	0.022	0.227	-0.11
944	-0.505	-0.603	-0.45	-0.773	-1.342	-1.56	-0.187	-0.284	-0.218	0.049	0.215	-0.142
948	-0.467	-0.583	-0.456	-0.81	-1.394	-1.633	-0.125	-0.219	-0.139	0.066	0.165	-0.221
952	-0.434	-0.567	-0.468	-0.883	-1.465	-1.701	-0.08	-0.168	-0.074	0.052	0.074	-0.351
956	-0.406	-0.553	-0.483	-0.948	-1.542	-1.753	-0.063	-0.144	-0.032	0.011	-0.048	-0.518
960	-0.392	-0.547	-0.501	-0.999	-1.619	-1.789	-0.069	-0.147	-0.012	-0.038	-0.176	-0.691
964	-0.395	-0.552	-0.526	-1.048	-1.696	-1.81	-0.09	-0.164	-0.009	-0.08	-0.284	-0.843
968	-0.402	-0.561	-0.556	-1.084	-1.758	-1.807	-0.109	-0.177	-0.011	-0.118	-0.371	-0.964
972	-0.408	-0.565	-0.585	-1.099	-1.797	-1.782	-0.101	-0.167	-0.012	-0.164	-0.454	-1.056
976	-0.408	-0.562	-0.608	-1.107	-1.824	-1.756	-0.062	-0.13	-0.013	-0.225	-0.544	-1.132
980	-0.395	-0.542	-0.614	-1.111	-1.834	-1.735	0.004	-0.075	-0.015	-0.285	-0.642	-1.199
984	-0.37	-0.503	-0.595	-1.091	-1.811	-1.704	0.08	-0.015	-0.014	-0.327	-0.74	-1.252
988	-0.335	-0.452	-0.558	-1.057	-1.768	-1.669	0.148	0.034	-0.017	-0.346	-0.82	-1.284
992	-0.294	-0.403	-0.516	-1.026	-1.722	-1.642	0.198	0.067	-0.022	-0.34	-0.873	-1.292
996	-0.251	-0.364	-0.475	-0.982	-1.667	-1.627	0.222	0.08	-0.024	-0.301	-0.885	-1.278
1000	-0.251	-0.364	-0.475	-0.982	-1.667	-1.627	0.222	0.08	-0.024	-0.301	-0.885	-1.278

## Sheet: Fig 2
	Response level [dB SPL]								Noise level [dB SPL]								SNR [dB]
	stimuli/task								stimuli/task								stimuli/task
	T	T	T	T+N	T+N	T+N			T	T	T	T+N	T+N	T+N			T	T	T	T+N	T+N	T+N
subject number	no task	passive	active	no task	passive	active		subject number	no task	passive	active	no task	passive	active		subject number	no task	passive	active	no task	passive	active
1	8.92861	9.54317	9.24445	7.00589	7.92663	7.70959		1	-9.6727	-9.71048	-10.8864	-9.52511	-10.5296	-9.72817		1	18.6013	19.2537	20.1309	16.531	18.4563	17.4378
2	12.457	13.2163	13.1781	10.7408	11.7463	11.7392		2	-11.0141	-11.5979	-11.3551	-11.5186	-12.0467	-10.0367		2	23.4711	24.8142	24.5332	22.2594	23.793	21.7759
3	13.3267	13.6721	14.4625	12.0279	12.4709	13.2374		3	-10.4845	-11.7493	-10.0331	-9.4656	-9.43303	-10.2536		3	23.8112	25.4213	24.4957	21.4935	21.9039	23.491
4	5.86061	7.11928	6.41387	5.11719	6.09069	5.44673		4	-9.15529	-8.00631	-8.11	-8.02296	-6.64504	-8.14854		4	15.0159	15.1256	14.5239	13.1402	12.7357	13.5953
5	4.94282	6.52563	6.51027	3.76269	5.70128	5.90637		5	-12.2415	-13.3973	-10.578	-11.3825	-12.191	-11.5962		5	17.1843	19.9229	17.0883	15.1451	17.8923	17.5026
6	5.26143	6.51335	5.8028	4.5166	5.85625	5.28487		6	-10.0973	-13.4714	-11.3276	-10.8835	-11.896	-11.9256		6	15.3587	19.9847	17.1304	15.4001	17.7523	17.2105
7	12.7589	13.0917	12.5147	12.0805	12.5019	11.9191		7	-11.4022	-8.40034	-6.05131	-11.1475	-7.3863	-7.73215		7	24.161	21.4921	18.566	23.228	19.8882	19.6512
8	13.811	13.811	13.8268	13.2921	13.3699	13.3211		8	-11.9935	-11.9935	-12.728	-11.9026	-11.5549	-12.5271		8	25.8044	25.8044	26.5548	25.1947	24.9247	25.8482
9	14.5122	12.7154	12.3944	13.9203	12.2997	12.0628		9	-11.5055	-11.3728	-11.513	-9.51096	-12.0378	-11.1891		9	26.0176	24.0882	23.9074	23.4312	24.3375	23.2518
10	18.6364	18.1351	18.4043	18.1735	17.7059	18.0353		10	-9.37064	-5.2718	-8.36173	-8.09391	-8.74092	-8.43121		10	28.007	23.4069	26.766	26.2674	26.4469	26.4665
11	12.9558	11.907	3.11198	12.6808	11.7578	2.40565		11	-10.3591	-10.9594	-9.03005	-9.74605	-10.8987	-9.66786		11	23.3149	22.8664	12.142	22.4268	22.6566	12.0735
12	6.83347	7.00965	9.87931	6.53296	6.69082	9.72522		12	-7.41205	-10.0183	-10.5835	-8.23852	-10.6365	-9.61063		12	14.2455	17.028	20.4628	14.7715	17.3273	19.3358
13	15.6515	14.736	14.6048	15.4163	14.5225	14.3346		13	-10.7326	-10.9053	-10.9671	-11.1459	-10.8134	-11.4462		13	26.3841	25.6413	25.5719	26.5621	25.3359	25.7808
14	16.6252	17.46	17.9954	16.3411	17.2415	17.8297		14	-11.628	-10.9758	-8.67519	-12.5086	-10.3257	-8.40036		14	28.2531	28.4359	26.6706	28.8497	27.5672	26.23
15	6.46291	6.02785	7.79675	6.46948	5.84018	7.42432		15	-7.58907	-6.36642	-8.1383	-9.6113	-6.02797	-7.19373		15	14.052	12.3943	15.935	16.0808	11.8681	14.6181
16	10.8429	9.50497	9.86243	10.5969	9.32711	9.94802		16	-7.78487	-9.25567	-5.18021	-6.34083	-6.88091	-6.63012		16	18.6277	18.7606	15.0426	16.9378	16.208	16.5781
17	13.6081	13.072	13.4157	13.5549	13.0513	13.3225		17	-11.361	-7.43765	-11.4556	-10.9234	-9.28945	-11.1218		17	24.9691	20.5096	24.8713	24.4783	22.3408	24.4443
18	9.90129	9.80359	9.70682	9.86728	9.81093	9.56987		18	-11.0131	-12.1351	-11.5422	-11.6745	-11.2046	-11.196		18	20.9144	21.9387	21.249	21.5418	21.0155	20.7659

## Sheet: Fig 3 and Fig 4
	Suppression [dB]
	task
subject number	no task	passive	active
1	1.92272	1.61654	1.53486
2	1.71617	1.46993	1.43881
3	1.29881	1.20117	1.22512
4	0.743419	1.02859	0.967135
5	1.18013	0.824358	0.603901
6	0.744835	0.657105	0.517923
7	0.678355	0.589846	0.59563
8	0.518883	0.441122	0.505638
9	0.591919	0.415691	0.331622
10	0.462888	0.429129	0.36902
11	0.275027	0.149173	0.706329
12	0.300517	0.318836	0.154091
13	0.235199	0.21349	0.270181
14	0.284022	0.218536	0.165724
15	-0.00656767	0.187675	0.372428
16	0.245911	0.177858	-0.0855857
17	0.0532434	0.0206655	0.0931859
18	0.0340112	-0.00734669	0.136948

## Sheet: Fig 5
	Suppression [dB]																				Suppression [dB]
	epoch/task																				frequency/task
	2.5-5 ms	2.5-5 ms	2.5-5 ms	5-7.5 ms	5-7.5 ms	5-7.5 ms	7.5-10 ms	7.5-10 ms	7.5-10 ms	10-12.5 ms	10-12.5 ms	10-12.5 ms	12.5-15 ms	12.5-15 ms	12.5-15 ms	15-17.5 ms	15-17.5 ms	15-17.5 ms			1 kHz	1 kHz	1 kHz	1.4 kHz	1.4 kHz	1.4 kHz	2 kHz	2 kHz	2 kHz	2.8 kHz	2.8 kHz	2.8 kHz	4 kHz	4 kHz	4 kHz
subject number	no task	passive	active	no task	passive	active	no task	passive	active	no task	passive	active	no task	passive	active	no task	passive	active		subject number	no task	passive	active	no task	passive	active	no task	passive	active	no task	passive	active	no task	passive	active
1	1.04745	1.2906	0.213245	2.02877	1.2552	1.25425	1.68106	1.35888	1.18969	1.68685	1.49327	1.50574	2.93339	3.0041	2.50889	2.98467	2.09998	2.54732		1	2.00524	1.64562	1.66109	1.14127	0.933765	1.12436	2.31943	2.3096	1.65284	1.38934	1.00745	0.715289	0.770779	1.03063	-0.148924
2	1.21333	1.12634	1.17343	1.00532	0.847031	0.750351	1.66324	1.40484	1.16353	2.24501	1.70737	1.71993	3.45788	2.95824	2.9377	3.60153	2.99055	2.8848		2	1.30186	1.20201	1.21754	1.19456	0.828212	0.956135	1.91051	1.45141	1.45796	1.91326	1.77476	1.67442	0.849896	0.821319	0.601097
3	0.81011	0.553376	0.679174	0.892421	0.845421	1.11231	0.91306	0.814543	0.765838	1.59229	1.35703	1.2678	2.14087	1.68734	1.99308	2.24076	2.13404	1.91223		3	1.46545	1.4227	1.58215	1.21941	1.1379	1.01635	1.21553	1.10265	1.03345	0.564548	0.392124	0.664515	0.678756	-0.129372	-0.0327911
4	0.110466	0.485965	0.202301	-0.229097	0.751475	0.344078	1.41707	1.14947	1.81356	1.75462	0.984411	1.90235	1.45162	1.50433	2.26862	2.44404	2.62244	2.25266		4	1.4581	1.60191	1.60515	1.53776	1.7164	1.9014	1.19607	1.14986	1.77605	-0.103158	0.42652	0.389973	0.177878	0.557423	0.185819
5	1.45232	0.577184	0.887037	-0.121644	0.4471	-0.0394959	1.44975	0.551748	0.321386	0.752707	0.945327	0.484203	1.30647	1.35093	0.923928	1.22303	0.614166	0.631512		5	1.13989	0.570143	0.52357	1.24799	0.661597	0.642924	1.36379	0.762492	1.49957	1.27412	0.943719	0.862686	0.838296	0.562818	0.380732
6	0.044508	0.176442	-0.181758	-0.128728	0.335244	0.574775	1.24577	0.369951	0.485797	1.28692	0.837421	0.951396	1.53688	1.23643	0.936568	1.18343	1.4252	1.2601		6	0.928387	0.715123	0.321942	1.44603	1.06087	0.800725	0.930818	0.573054	0.851972	0.231384	0.480957	0.5908	-0.588515	0.686546	-0.126184
7	0.560447	0.513137	0.796959	0.292589	0.481356	0.354253	0.68087	0.77523	0.489328	0.868761	0.376642	0.555658	0.653978	0.239788	0.55639	1.55502	1.47066	1.45088		7	0.892072	0.589236	0.700594	0.54651	0.393822	0.314789	0.691263	0.613142	0.864428	0.480074	0.856002	0.444016	0.508345	0.377896	0.554332
8	0.925192	0.478231	0.849783	0.525057	0.525491	0.399553	0.456418	0.429121	0.438573	0.375131	0.216938	0.381651	0.485383	0.575328	0.580161	1.15779	1.04738	1.2933		8	0.472593	0.371054	0.427845	0.524759	0.55604	0.569121	0.50684	0.0435918	0.514416	0.137404	-0.139934	0.861762	0.698095	0.170501	0.404298
9	-0.408015	-0.336727	-0.249838	0.186847	-0.0618279	0.140077	0.531555	0.405487	0.309707	1.00754	0.581131	0.556546	0.969988	0.703621	0.376131	1.63828	1.63655	1.30274		9	0.991286	0.669212	0.43078	0.559095	0.346578	0.219025	0.543787	0.456318	0.389861	0.898134	0.6048	0.458149	0.732682	0.546287	0.41009
10	0.321528	0.366706	0.104827	0.227973	0.185563	0.211023	0.41484	0.393367	0.340649	0.467205	0.477618	0.334355	0.698006	0.598507	0.478604	0.894416	0.806472	0.689962		10	1.15778	1.13202	1.1334	0.475087	0.468886	0.365552	0.456155	0.447182	0.429331	0.410387	0.325138	0.224917	0.273611	0.193272	0.266411
11	0.105925	-0.293128	-0.321362	0.0731581	0.0340445	0.0917896	0.277617	0.315197	1.20049	0.366074	0.439172	1.7404	0.647567	0.124456	1.12108	0.916909	0.0353449	-0.0605536		11	0.135711	0.35564	-0.906016	0.364994	0.214498	1.07828	0.183826	0.023385	0.722721	0.0662894	0.169702	-0.307357	-0.0511398	-0.385542	-0.817355
12	0.156234	0.238468	0.136192	0.2483	0.206092	0.0692465	0.579474	0.705501	0.594544	0.0674192	1.77456	0.128272	-0.449572	0.14137	-0.926655	0.954776	-0.695129	-0.105589		12	0.339622	0.769107	0.333978	0.022805	0.515443	0.125321	0.760988	-0.074993	0.688206	0.194575	0.306202	0.111031	0.30563	-0.0278081	0.219756
13	0.192386	0.124797	0.118432	0.189004	0.185867	0.359938	0.354681	0.301958	0.426001	0.337656	0.342823	0.362841	0.0701981	0.199616	0.345013	0.423257	0.774828	0.270029		13	0.297215	0.304772	0.23653	0.188851	0.313415	0.385021	0.336782	0.338669	0.387179	0.101558	0.197157	0.21535	0.230041	0.113247	0.1821
14	0.497399	0.267413	0.564859	0.341486	0.304913	0.247828	0.178408	0.136698	-0.0995427	0.251458	0.174458	0.186966	0.397894	0.346069	0.530246	0.36554	0.232381	0.149584		14	0.308265	0.324166	0.286275	0.402974	0.357155	0.242782	0.215642	0.0723024	0.058207	0.0671901	0.102578	0.156825	0.164171	-0.0792369	0.113598
15	-0.191002	1.07724	0.649546	0.263748	0.374368	0.415692	-0.0797904	0.28106	0.327559	0.0256608	-0.815227	0.16074	-0.421978	0.887215	1.04548	0.945856	-0.179381	0.222318		15	0.0727951	-0.212417	0.413796	-0.412437	-0.0396566	0.483299	0.13499	0.377182	0.355071	0.245661	0.379069	0.532358	-0.108876	-0.363832	-1.12805
16	0.165926	0.239128	-0.165676	0.285969	0.1962	0.263506	0.258663	-0.238185	-0.100303	0.347624	-0.185163	1.30646	0.622101	-0.115579	-2.18872	-0.0489965	1.28303	-0.706034		16	-0.293484	-0.0584949	0.238547	0.205125	0.336086	-0.0668041	0.0865433	0.0162521	-0.291796	0.33343	-0.0264765	-0.0389965	0.0816255	-0.119209	-0.0733453
17	-0.0836932	0.195879	0.0963543	0.00359013	-0.00991222	0.130096	0.0858007	0.0315333	0.112978	0.188437	0.0213262	0.0402126	0.266332	-0.359729	-0.0526574	0.109485	0.434832	0.0855009		17	0.0449343	0.150628	0.112945	0.111048	0.0544856	0.0817673	0.1416	0.132513	0.186566	-0.0368236	0.106765	0.227193	-0.00905187	-0.0146835	0.0782343
18	-0.00458683	0.374932	0.0856717	-0.123192	-0.11143	-0.234366	0.141912	-0.0905804	0.258655	0.0231484	-0.000931398	0.204376	0.489723	0.0851953	0.342972	0.272495	-0.112221	0.877441		18	0.151678	0.111561	0.232379	-0.225794	-0.153374	0.129265	-0.36486	-0.380701	-0.32341	0.331504	0.038639	0.017319	-0.135011	-0.466417	0.628692

## Sheet: Fig 6
	Rejection rates [%]
	stimuli/task
	T	T	T	T+N	T+N	T+N
subject number	no task	passive	active	no task	passive	active
1	35.1229	11.342	6.7907	34.7883	14.6633	6.79702
2	5.33708	5.38752	2.43665	7.22892	4.39351	5.37428
3	4	3.49515	5.60928	5.74388	3.23847	8.30946
4	8.4172	11.3636	6.8582	5.24836	12.7289	6.71016
5	2.43665	1.57325	4.3021	1.66994	1.37931	4.37678
6	14.383	9	9.60503	14.5175	6.94064	9.65704
7	14.4891	17.1381	31.1313	16.6528	18.2645	30.6545
8	4.21053	4.21053	1.45773	3.93474	1.1846	3.00388
9	2.13178	3.08285	8.13528	3.09777	3.65736	9.24751
10	17.9508	43.483	27.6832	14.4891	45.6274	27.6786
11	14.7959	9.41176	6.54378	14.3713	8.62852	8.58447
12	57.3861	29.6062	14.7359	55.7143	28.6833	14.3713
13	5.92105	5.74359	6.28466	4.36847	6.06996	7.91168
14	6.79702	14.273	13.0321	4.91958	15.873	11.5419
15	26.6943	31.8244	50.0507	33.2221	30.1939	51.3431
16	8.08081	16.4716	12.0175	7.82689	14.8085	10.8638
17	14.0304	3.69668	8.10565	15.0576	4.21053	7.65683
18	23.4985	7.05664	6.31383	25.0187	6.53595	7.14286
